# Supplementary material
Source: Research Square preprint supplement (doi:10.21203/rs.3.rs-9586510/v1)
Supplement: Supplementary file 1 [file bf34f8d0846e4757ac4dbb77.docx]

Optimal Allocation for Chapter 3

The basic utility function in this research is the CRRA model: for and ; for . For the former, as a more general case, *r* is the CRRA index of risk aversion and u takes the form and . For the latter,and ,when differentiate w.r.t. *X* and put the answer equal to 0 to find the optimal allocation, substituting for u'(). Under this case, we can directly replace r as 1 in u’().

To find the optimal allocation, a more general case, would be used as following:

Part RL (Risk Lottery)


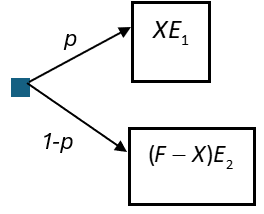


It is a one-stage risky lottery. A decision-maker (DM), who has a CRRA utility function, is offered the endowment *F* and asked to decide how many tokens allocated to Red *X* with the exchange rate *E1*, and Yellow *(F-X)* with the exchange rate *E2*. The probability of Red happening is *p* and that of Yellow happening is *1-p*. If Red happens, the DM will get . If Yellow happens, the DM will get .

The expected utility should be:

Consider the risk-averse case first when for and .

*r* is the CRRA index of risk aversion and u takes the form

It follows that:

Differentiate w.r.t. *X* and put the answer equal to zero (to find the optimal *X*), and substituting for u'();

Risk-Neutral case (when *r=0*):

If *pE1* > *(1-p)E2*, subjects will allocate all tokens to Red, which means that *X = F;*

If *pE1* < *(1-p)E2*, subjects will allocate all tokens to Yellow, which means that *X = 0;*

*Otherwise, X=F/2.*

Risk-Lover case (when *r<0*):

The risk-lover case should also be considered. When *r < 0*, the second-order derivative function of EU becomes positive which indicates that there is a strict convex function of the expected utility, and the maximum is at a boundary *X=0* or *X=F.* The optimal allocation is determined by which solution generates better expected utility so,

General Form

Note that this can be expressed as a general problem: to choose *X,* the allocationto maximise with probability *P* for getting the amount *XE1* and *Q* for getting the amount *(F-X)E2*. *E1* and *E2* are exchange rates between money and tokens for each possibility.

Differentiate w.r.t. *X* and put the answer equal to zero (to find the optimal *X*)

This general form can be applied in following problems.

Before finding the optimal allocation for each problem under various models, it is important to understand what these problems are.

Part ALA (Ambiguous Lottery A):


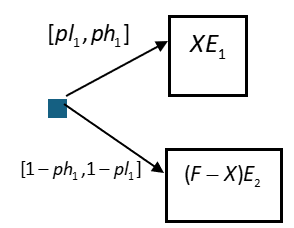


It is a one-stage ambiguous lottery. A DM is offered the endowment *F* and asked to decide how many tokens allocated to Red *X* with the exchange rate *E1*, and Yellow *(F-X)* with the exchange rate *E2*. They are only informed the highest probability of Red happening is *ph1,* and the lowest probability of Red happening is *pl1,* so the highest probability of Yellow happening is *1-pl1* and the lowest probability of Yellow happening is *1-ph1*. If Red happens, the DM will get *XE1*. If Yellow happens, the DM will get *(F-X)E2*.

Part ALB (Ambiguous Lottery B):


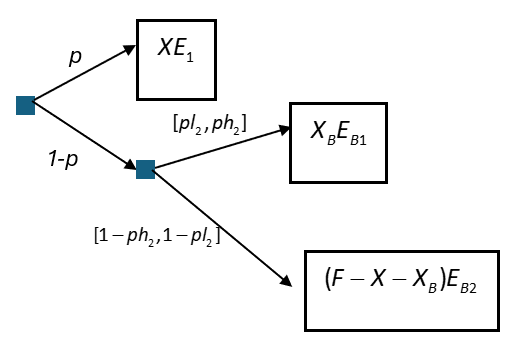


It is a two-stage ambiguous lottery. A DM is given an endowment of *F* tokens to allocate between Red, with probability of Red happening *p*, and another event which has the residual probability of *1-p* of happening. Denote the allocation to Red by *X*. There is an exchange rate *E1* between tokens and money for Red. If Red happens, then the DM will get paid *XE1*. If Red does not happen, the DM will have to take another allocation decision: out of the remainder of the endowment *(F-X)*, the DM must choose *XB* to allocate to Blue which has the highest probability *ph2* of occurring and the lowest probability *pl2* of occurring - if it does occur the DM will get paid *XBEB1*; where *EB1* is the exchange rate between tokens and money for Blue; if it does not occur, the DM will get paid *(F-X-XB)EB2* where *EB2* is the exchange rate between tokens and money for Purple.

Part ALC (Ambiguous Lottery C)


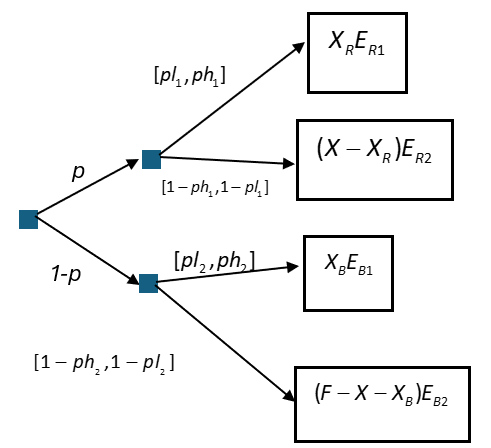


It is a two-stage ambiguous lottery. A DM is given an endowment of *F* tokens to allocate between the event - Red or Orange with probability *p* of happening, and another event (Blue or Purple) which has the residual probability of *1-p* of happening. Denote the allocation to Red or Orange by *X*. If Red or Orange does happen, the DM will have to take another allocation decision: based on the endowment *X* to choose *XR* to allocate to Red which has the highest probability *ph1* of occurring and the lowest probability *pl1* of occurring with the exchange rate *ER1*. If Red happens, the DM will get *XRER1*. If Red does not happen, the DM will get paid *(X-XR)ER2*, where *ER2* is the exchange rate between tokens and money for Orange. Similarly, If Red or Orange does not happen, the DM will have to take another allocation decision: out of the remainder of the endowment *(F-X)*, the DM must choose *XB* to allocate to Blue which has the highest probability *ph2* of occurring and the lowest probability *pl2* of occurring - if it does occur the DM gets paid *XBEB1* where *EB1* is the exchange rate between tokens and money for Blue; if it does not occur, the DM gets paid *(F-X-XB)EB2* where *EB2* is the exchange rate between tokens and money for Purple.

Details of finding the optimal allocation showing as below for each model:

(S)EU model:

Part ALA (Ambiguous Lottery A):

With the (S)EU model, suppose an individual generate his/her own subjective probability under ambiguous situations.

The perceived probability of Red happening is: *p1;*

The perceived probability of Yellow Lottery happening is: *1-p1*;

The expected utility is:

This is of the general form above if we put and . It follows that the optimal allocation *X* is given by

Risk-Neutral and Risk-Lover case are as same as that in Part RL.

Part ALB (Ambiguous Lottery B):

The probability of Red happening is: *p*;

The probability of Blue or Purple happening is *1-p*;

The perceived probability of Blue happening is: *p2 = (pl2 + ph2)/2;*

The perceived probability of Purple happening is: *1-p2;*

Suppose the DM is required to decide *X* and *XB* at the beginning, and then the expected utility is:

Using the backward method:

Partially differentiating w.r.t. *XB* and putting the answer equal to zero (to find the optimal *XB*)

This is of the general form above if we put *,*  and . It follows that the optimal allocation *XB* is given by

Finding the optimal allocation *X* at the first stage:

As *XB* is a function of *X,* the expected utility of this problem can be written as:

Differentiating w.r.t. *X* and putting the answer equal to zero (to find the optimal *X*)

According to the partial derivative of *XB,*

The derivative of *X* can be written as

Substituting *M* with and *XB* with

This is of the general form above if we put , , and .

It follows that the optimal allocation *X* is given by

Risk-Neutral case:

If *pE1 > (1-p)(p2EB1 + (1-p2)EB2),* subjects will allocate all tokens to Red, which means that *X = F and XB = 0;*

If *pE1 < (1-p)(p2EB1 + (1-p2)EB2)* and *p2EB1 > (1-p2)EB2*, subjects will allocate all tokens to Blue, which means that *X = 0 and XB = F;*

If *pE1 < (1-p)(p2EB1 + (1-p2)EB2)* and *p2EB1 < (1-p2)EB2*, subjects will allocate all tokens to Purple, which means that *X = 0 and XB = 0;*

If *pE1 < (1-p)(p2EB1 + (1-p2)EB2)* and *p2EB1 = (1-p2)EB2*, subjects will allocate a half of endowments to Blue and the rest tokens to Purple, which means that *X = 0 and XB = F/2;*

If *pE1 = (1-p)(p2EB1 + (1-p2)EB2) and p2EB1 > (1-p2)EB2,* subjects will allocate half of endowments to Red and all rest tokens to Blue, which means that *X = F/2 and XB = F/2;*

If *pE1 = (1-p)(p2EB1 + (1-p2)EB2) and p2EB1 < (1-p2)EB2,* subjects will allocate half of endowments to Red and all rest tokens to Purple, which means that *X = F/2 and XB = 0;*

Otherwise, *X = F/2 and XB = F/4.*

Risk-Lover case:

Using the backward method, consider the second stage first:

Given stage-2 optimal payoff, stage-1 problem becomes:

Part ALC (Ambiguous Lottery C):

The probability of Red or Orange happening: *p*;

The probability of Blue or Purple happening: *1-p*;

The perceived probability of Red happening is: *p1 = (pl1+ph1)/2*;

The perceived probability of Orange happening is: *1- p1;*

The perceived probability of Blue happening is: *p2= (pl2+ph2)/2*;

The perceived probability of Purple happening is: *1- p2;*

Suppose the DM is required to decide *X, XR* and *XB* at the beginning, and then the expected utility is:

Using the backward method:

Partially differentiating w.r.t. *XR*, and putting the answer equal to zero (to find the optimal *XR*)

This is of the general form above if we put , and . It follows that the optimal allocation *XR* is given by

Partially differentiating w.r.t. *XB* and putting the answer equal to zero (to find the optimal *XB*)

This is of the general form above if we put *,*  and . It follows that the optimal allocation *XB* is given by

Finding the optimal allocation *X* at the first stage:

As both *XR* and *XB* are functions of *X,* the expected utility of this problem can be written as:

Differentiating w.r.t. *X* and putting the answer equal to zero (to find the optimal *X*)

According to the partial derivative of *XR* and *XB*

The derivative of *X* is

Substituting *G* with , *M* with , *XR* with , and *XB* with , so

This is of the general form above if we put , , and

It follows that the optimal allocation *X* is given by

Risk-Neutral case:

If *p(p1ER1 + (1-p1)ER2) > (1-p)(p2EB1 + (1-p2)EB2) and p1ER1 > (1-p1)ER2,* subjects will allocate all tokens to Red, which means that *X = F, XR = F and XB = 0;*

If *p(p1ER1 + (1-p1)ER2) > (1-p)(p2EB1 + (1-p2)EB2) and p1ER1 < (1-p1)ER2,* subjects will allocate all tokens to Orange, which means that *X = F, XR = 0 and XB = 0;*

If *p(p1ER1 + (1-p1)ER2) > (1-p)(p2EB1 + (1-p2)EB2) and p1ER1 = (1-p1)ER2,* subjects will allocate a half of endowments to Red and the rest tokens to Orange, which means that *X = F, XR = F/2 and XB = 0;*

If *p(p1ER1 + (1-p1)ER2) < (1-p)(p2EB1 + (1-p2)EB2)* and *p2EB1 > (1-p2)EB2*, subjects will allocate all tokens to Blue , which means that *X = 0, XR = 0 and XB = F;*

If *p(p1ER1 + (1-p1)ER2) < (1-p)(p2EB1 + (1-p2)EB2)* and *p2EB1 < (1-p2)EB2*, subjects will allocate all tokens to Purple, which means that *X = 0, XR = 0 and XB = 0;*

If *p(p1ER1 + (1-p1)ER2) < (1-p)(p2EB1 + (1-p2)EB2)* and *p2EB1 = (1-p2)EB2*, subjects will allocate a half of endowments to Blue and the rest tokens to Purple, which means that *X = 0, XR = 0 and XB = F/2;*

If *p(p1ER1 + (1-p1)ER2) = (1-p)(p2EB1 + (1-p2)EB2),* *p1ER1 > (1-p1)ER2* and *p2EB1 > (1-p2)EB2,*subjects will allocate a half of endowments to Lottery RO and the rest to Lottery BP. Then they will allocate all tokens within the Lottery RO to Red and all tokens within the Lottery BP to Blue, which means that *X = F/2, XR = F/2 and XB = F/2;*

If *p(p1ER1 + (1-p1)ER2) = (1-p)(p2EB1 + (1-p2)EB2),* *p1ER1 > (1-p1)ER2* and *p2EB1 < (1-p2)EB2,*subjects will allocate a half of endowments to Lottery RO and the rest to Lottery BP. Then they will allocate all tokens within the Lottery RO to Red and all tokens within the Lottery BP to Purple, which means that *X = F/2, XR = F/2 and XB = 0;*

If *p(p1ER1 + (1-p1)ER2) = (1-p)(p2EB1 + (1-p2)EB2),* *p1ER1 > (1-p1)ER2* and *p2EB1 = (1-p2)EB2,*subjects will allocate a half of endowments to Lottery RO and the rest to Lottery BP. Then they will allocate all tokens within the Lottery RO to Red, a half of tokens within the Lottery BP to Blue and the rest tokens to Purple, which means that *X = F/2, XR = F/2 and XB = F/4;*

If *p(p1ER1 + (1-p1)ER2) = (1-p)(p2EB1 + (1-p2)EB2),* *p1ER1 < (1-p1)ER2* and *p2EB1 < (1-p2)EB2,*subjects will allocate a half of endowments to Lottery RO and the rest to Lottery BP. Then they will allocate all tokens within the Lottery RO to Orange and all tokens within the Lottery BP to Purple, which means that *X = F/2, XR = 0 and XB = 0;*

If *p(p1ER1 + (1-p1)ER2) = (1-p)(p2EB1 + (1-p2)EB2),* *p1ER1 < (1-p1)ER2* and *p2EB1 > (1-p2)EB2,*subjects will allocate a half of endowments to Lottery RO and the rest to Lottery BP. Then they will allocate all tokens within the Lottery RO to Orange and all tokens within the Lottery BP to Blue, which means that *X = F/2, XR = 0 and XB = F/2;*

If *p(p1ER1 + (1-p1)ER2) = (1-p)(p2EB1 + (1-p2)EB2),* *p1ER1 < (1-p1)ER2* and *p2EB1 = (1-p2)EB2,*subjects will allocate a half of endowments to Lottery RO and the rest to Lottery BP. Then they will allocate all tokens within the Lottery RO to Orange, a half of tokens within the Lottery BP to Blue, and the rest tokens to Purple which means that *X = F/2, XR = 0 and XB = F/4;*

Otherwise, *X = F/2, XR = F/4 and XB = F/4.*

Risk-Lover case:

Using the backward method and considering the second stage first:

Given stage-2 optimal payoff, stage-1 problem becomes:

AMM model:

Subjects are informed the lowest and highest probabilities and are assumed to use such information to process ambiguity. Under the AMM model, is the weight on the worst result and is the weight on the best result.

Part ALA (Ambiguous Lottery A):

The Endowment: *F*; Allocation to Red: *X*; Exchange Rate of Red: *E1*; Exchange Rate of Yellow: *E2*;

The lowest probability of Red happening is: *pl1*;

The highest probability of Red happening is: *ph1;*

The lowest probability of Yellow happening is: *1-ph1;*

The highest probability of Yellow happening is: *1-pl1.*

The expected utility under the AMM model is:

This is of the general form above if we put and . It follows that the optimal allocation *X* is given by

Risk neutral case:

If , subjects will allocate all tokens to Red, so *X = F*.

If, subjects will allocate all tokens to Yellow, so *X = 0*.

Otherwise, *X = F/2.*

Risk-Lover case:

Part ALB (Ambiguous Lottery B):

The Endowment: *F*; Allocation to Red: *X*; Allocation to Blue: *XB*; Exchange Rate of Red: *E1*; Exchange Rate of Blue: *EB1*; Exchange Rate of Purple: *EB2*;

The probability of Red happening is: *p*;

The probability of the Lottery BP (i.e. Blue or Purple) happening is *1-p*;

The lowest probability of Blue happening is *pl2*;

The highest perceived probability of Blue happening is *ph2*;

The lowest perceived probability of Purple happening is *1-ph2*;

The highest perceived probability of Purple happening is *1-pl2.*

The expected utility under the AMM model is:

For the backward method, looking at the second stage first:

Partially differentiating w.r.t. *XB* and putting the answer equal to zero (to find the optimal *XB*)

This is of the general form above if we put , and . It follows that the optimal allocation *XB* is given by

Finding the optimal allocation *X* at the first stage:

As *XB* is a function of *X,* the expected utility of this problem can be written as:

Differentiating w.r.t. *X* and putting the answer equal to zero (to find the optimal *X*)

According to the partial derivative of *XB,*

The derivative of *X* can be written as

Substituting *M* with and *XB* with

This is of the general form above if we put , and .

It follows that the optimal allocation *X* is given by

Risk neutral case:

If , subjects will allocate all tokens to Red, so *X = F* and *XB* *= 0*;

If and , subjects will allocate all tokens to Blue, so *X = 0* and *XB* *= F*;

If and , subjects will allocate all tokens to Purple, so *X = 0* and *XB* *= 0*;

If and , subjects will allocate a half of endowments to Blue and the rest tokens to Purple, so *X = 0* and *XB* *= F/2*;

If and , subjects will allocate a half of endowments to Red and all rest tokens to Blue, so *X = F/2* and *XB* *= F/2*;

If and , subjects will allocate a half of endowments to Red and all rest tokens to Purple, so *X = F/2* and *XB* *= 0*;

Otherwise, *X = F/2* and *XB* *= F/4.*

Risk-Lover case:

Using the backward method and considering the second stage first:

Given stage-2 optimal payoff, stage-1 problem becomes:

Part ALC (Ambiguous Lottery C):

The Endowment: *F*; Allocation to Red and Orange: *X*; Allocation to Red: *XR*; Allocation to Orange: *X-XR;* Allocation to Blue and Purple: *F-X*; Allocation to Blue: *XB*; Allocation to Purple: *F-X-XB;* Exchange Rate of Red: *ER1*; Exchange Rate of Orange: *ER2;* Exchange Rate of Blue: *EB1*; Exchange Rate of Purple: *EB2*;

The probability of Red or Orange happening: *p*;

The probability of the Lottery BP (i.e. Blue or Purple) happening: *1-p*;

The lowest probability of Red happening is *pl1*;

The highest probability of Red happening is *ph1*;

The lowest probability of Orange happening is *1-ph1*;

The highest probability of Orange happening is *1-pl1*;

The lowest probability of Blue happening is *pl2*;

The highest probability of Blue happening is *ph2*;

The lowest probability of Purple happening is: *1-ph2*;

The highest probability of Purple happening is *1-pl2*;

The expected utility under the AMM model is:

Using the backward method:

Partially differentiating w.r.t. *XR* and putting the answer equal to zero (to find the optimal *XR*)

This is of the general form above if we put , and . It follows that the optimal allocation *XR* is given by

Partially differentiating w.r.t. *XB* and putting the answer equal to zero (to find the optimal *XB*)

This is of the general form above if we put *,*  and . It follows that the optimal allocation *XB* is given by

Finding the optimal allocation *X* at the first stage:

As both *XR* and *XB* are functions of *X,* the expected utility of this problem can be written as:

Differentiating w.r.t. *X* and putting the answer equal to zero (to find the optimal *X*)

According to the partial derivative of *XR* and *XB*

The derivative of *X* is

Substituting *G* with, *M* with, *XR* with , and *XB* with , so

This is of the general form above if we put , , and .

It follows that the optimal allocation *X* is given by

Risk neutral case:

If > and , subjects will allocate all tokens to Red, so *X = F, XR = F* and *XB* *= 0*;

If > and , subjects will allocate all tokens to Orange, so *X = F, XR = 0* and *XB* *= 0*;

If > and , subjects will allocate a half of endowments to Red and the rest tokens to Orange, so *X = F, XR = F/2* and *XB* *= 0*;

If < and , subjects will allocate all tokens to Blue, so *X = 0, XR = 0* and *XB* *= F*;

If < and , subjects will allocate all tokens to Purple, so *X = 0, XR = 0* and *XB* *= 0*;

If < and , subjects will allocate a half of endowments to Blue and the rest tokens to Purple, so *X = 0, XR = 0* and *XB* *= F/2*;

If =, and, subjects will allocate a half of endowments to the Lottery RO and a half to the Lottery BP. Then, subjects will allocate all tokens within the Lottery RO to Orange and all tokens within the Lottery BP to Blue, so *X = F/2, XR = 0* and *XB* *= F/2*;

If =, and, subjects will allocate a half of endowments to the Lottery RO and a half to the Lottery BP. Then, subjects will allocate all tokens within the Lottery RO to Orange and all tokens within the Lottery BP to Purple, so *X = F/2, XR = 0* and *XB* *= 0*;

If =, and, subjects will allocate a half of endowments to the Lottery RO and a half to the Lottery BP. Then, subjects will allocate all tokens within the Lottery RO to Orange, a half of tokens within the Lottery BP to Blue and the rest tokens within the Lottery BP to Purple, so *X = F/2, XR = 0* and *XB* *= F/4*;

If =, and, subjects will allocate a half of endowments to the Lottery RO and a half to the Lottery BP. Then, subjects will allocate all tokens within the Lottery RO to Red and all tokens within the Lottery BP to Purple, so *X = F/2, XR = F/2* and *XB* *= 0*;

If =, and, subjects will allocate a half of endowments to the Lottery RO and a half to the Lottery BP. Then, subjects will allocate all tokens within the Lottery RO to Red and all tokens within the Lottery BP to Blue, so *X = F/2, XR = F/2* and *XB* *= F/2*;

If =, and, subjects will allocate a half of endowments to the Lottery RO and a half to the Lottery BP. Then, subjects will allocate all tokens within the Lottery RO to Red, a half of tokens within the Lottery BP to Blue and the rest tokens within the Lottery BP to Purple, so *X = F/2, XR = F/2* and *XB* *= F/4*;

Otherwise, *X = F/2, XR = F/4* and *XB* *= F/4*.

Risk-Lover case:

Using the backward method and considering the second stage first:

Given stage-2 optimal payoff, stage-1 problem becomes:

CEU model:

I assumed that the raw probability is *p*, and individual distorts *p* with the capacity function.

The capacity function applied here is the Power Capacity:

Part ALA (Ambiguous Lottery A):

The Endowment: *F*; Allocation to Red: *X*; Exchange Rate of Red: *E1*; Exchange Rate of Yellow: *E2*;

The perceived probability of Red happening is: *p;*

The perceived probability of Yellow Lottery happening is: *1-p*;

If , the expected utility under the CEU model will be:

This is of the general form above if we put and .

It follows that the optimal allocation *X* is given by

If , the expected utility under the CEU model will be:

This is of the general form above if we put and .

It follows that the optimal allocation *X* is given by

Risk neutral case:

Case 1. When *E1 > E2*,

If , subjects will allocate all tokens to Red, so *X = F;*

If , subjects will allocate all tokens to Yellow, so *X = 0;*

Otherwise*, X = F/2.*

Case 2. When *E1 < E2*,

If , subjects will allocate all tokens to Red, so *X = F;*

If , subjects will allocate all tokens to Yellow, so *X = 0;*

Otherwise*, X = F/2.*

Risk-Lover case:

Case 1. If , the expected utility under the CEU model will be:

Case 2. If , the expected utility under the CEU model will be:

If *X=0*, it belongs to case 2, so

If *X=F*, it belongs to case 1, so

If , *X=F.* Otherwise, *X=0.*

Part ALB (Ambiguous Lottery B):

The Endowment: *F*; Allocation to Red: *X*; Allocation to Blue: *XB*; Exchange Rate of Red: *E1*; Exchange Rate of Blue: *EB1*; Exchange Rate of Purple: *EB2*;

The probability of Red happening is: *p*;

The probability of Lottery BP (i.e. Blue or Purple) happening is *1-p*;

The perceived probability of Blue happening is: *p2;*

The perceived probability of Purple happening is: *1-p2;*

If , the expected utility under the CEU model is:

Using the backward method:

Partially differentiating w.r.t. *XB* and putting the answer equal to zero (to find the optimal *XB*)

This is of the general form above if we put *,*  and . It follows that the optimal allocation *XB* is given by

Finding the optimal allocation *X* at the first stage:

As *XB* is a function of *X,* the expected utility of this problem can be written as:

Differentiating w.r.t. *X* and putting the answer equal to zero (to find the optimal *X*)

According to the partial derivative of *XB,*

The derivative of *X* can be written as

Substituting *M* with and *XB* with

This is of the general form above if we put , , and .

It follows that the optimal allocation *X* is given by

If, the expected utility under the CEU model is:

Using the backward method:

Partially differentiating w.r.t. *XB* and putting the answer equal to zero (to find the optimal *XB*)

With the similar procedure, the optimal allocation *XB* is given by

Finding the optimal allocation *X* at the first stage:

As *XB* is a function of *X,* the expected utility of this problem can be written as:

Differentiating w.r.t. *X* and putting the answer equal to zero (to find the optimal *X*)

According to the partial derivative of *XB,*

With the similar procedure, the derivative of *X* can be written as

Substituting *M* with and *XB* with

This is of the general form above if we put , and .

It follows that the optimal allocation *X* is given by

Risk neutral case:

Case 1. When *EB1 > EB2*,

If , subjects will allocate all tokens to Red, so *X = F* and *XB =0;*

If and , subjects will allocate all tokens to Blue, so *X = 0* and *XB = F;*

If and , subjects will allocate all tokens to Purple, so *X = 0* and *XB = 0;*

If and , subjects will allocate a half of endowments to Blue and the rest tokens to Purple, so *X = 0* and *XB = F/2;*

If and , subjects will allocate a half of endowments to Red and all rest tokens to Purple, so *X = F/2* and *XB = 0;*

If and , subjects will allocate a half of endowments to Red and all rest tokens to Blue, so *X = F/2* and *XB = F/2;*

Otherwise, *X = F/2* and *XB = F/4.*

Case 2. When *EB1 < EB2*,

If , subjects will allocate all tokens to Red, so *X = F and XB = 0;*

If and , subjects will allocate all tokens to Blue, so *X = 0* and *XB = F;*

If and , subjects will allocate all tokens to Blue, so *X = 0* and *XB = 0;*

If and , subjects will allocate a half of endowments to Blue and the rest tokens to Purple, so *X = 0* and *XB = F/2;*

If and , subjects will allocate a half of endowments to Red and the rest tokens to Blue, so *X = F/2* and *XB = F/2;*

If and , subjects will allocate a half of endowments to Red and the rest tokens to Purple, so *X = F/2* and *XB = 0;*

*Otherwise, X = F/2* and *XB = F/4.*

Risk-Lover case:

Using the backward method, and considering the second stage first:

Case 1. If , the expected utility under the CEU model is:

Case 2. If, the expected utility under the CEU model is:

If *XB=0,* it belongs to Case 2, so .

If *XB=F-X,* it belongs to Case 1, so.

If , *XB=F-X.* Otherwise, *XB=0.*

Given stage-2 optimal payoff, stage-1 problem becomes:

Part ALC (Ambiguous Lottery C):

The Endowment: *F*; Allocation to Red and Orange: *X*; Allocation to Red: *XR*; Allocation to Orange: *X-XR;* Allocation to the Lottery BP (i.e. Blue or Purple): *F-X*; Allocation to Blue: *XB*; Allocation to Purple: *F-X-XB;* Exchange Rate of Red: *ER1*; Exchange Rate of Orange: *ER2;* Exchange Rate of Blue: *EB1*; Exchange Rate of Purple: *EB2*;

The probability of the Lottery RO (i.e. Red or Orange) happening: *p*;

The probability of the Lottery BP (i.e. Blue or Purple) happening: *1-p*;

The perceived probability of Red happening is: *p1*;

The perceived probability of Orange happening is: *1- p1;*

The perceived probability of Blue happening is: *p2*;

The perceived probability of Purple happening is: *1- p2;*

Considering the second stage first by using the backward method:

If Red or Orange happens:

If

This is of the general form above if we put , and . It follows that the optimal allocation *XR* is given by

If

This is of the general form above if we put , and . It follows that the optimal allocation *XR* is given by

If Blue or Purple happens:

If

This is of the general form above if we put *,*  and . It follows that the optimal allocation *XB* given by

If

This is of the general form above if we put *,*  and . It follows that the optimal allocation *XB* is given by

For the first stage, there are four conditions need to be considered:

If && :

The expected utility under the CEU model is:

As both *XR* and *XB* are functions of *X,* the expected utility of this problem can be written as:

Differentiating w.r.t. *X* and putting the answer equal to zero (to find the optimal *X*)

According to the partial derivative of *XR* and *XB*

The derivative of *X* is

Substituting *G* with, *M* with, *XR* with , and *XB* with , so

This is of the general form above if we put , , and .

It follows that the optimal allocation *X* is given by

If && :

The expected utility under the CEU model is:

As both *XR* and *XB* are functions of *X,* the expected utility of this problem can be written as:

Differentiating w.r.t. *X* and putting the answer equal to zero (to find the optimal *X*)

According to the partial derivative of *XR* and *XB*

With the similar procedure, the derivative of *X* is

This is of the general form above if we put , , and .

It follows that the optimal allocation *X* is given by

If && :

The expected utility under the CEU model is:

As both *XR* and *XB* are functions of *X,* the expected utility of this problem can be written as:

Differentiating w.r.t. *X* and putting the answer equal to zero (to find the optimal *X*)

According to the partial derivative of *XR* and *XB*

With the similar procedure, the derivative of *X* is

This is of the general form above if we put , , and .

It follows that the optimal allocation *X* is given by

If && :

The expected utility under the CEU model is:

As both *XR* and *XB* are functions of *X,* the expected utility of this problem can be written as:

Differentiating w.r.t. *X* and putting the answer equal to zero (to find the optimal *X*)

According to the partial derivative of *XR* and *XB*

With the similar procedure, the derivative of *X* is

This is of the general form above if we put , , and .

It follows that the optimal allocation *X* is given by

Risk Neutral Case:
Case 1. When *ER1 > ER2* and *EB1 > EB2*

If > and , subjects will allocate all tokens to Red, so *X = F, XR = F* and *XB = 0;*

If > and , subjects will allocate all tokens to Orange, so *X = F, XR = 0* and *XB = 0;*

If > and , subjects will allocate all tokens to the Lottery RO, and then a half of endowments to Red and the rest tokens to Orange, so *X = F, XR = F/2* and *XB = 0;*

If < and , subjects will allocate all tokens to Blue, so *X = 0, XR = 0* and *XB = F;*

If < and , subjects will allocate all tokens to Purple, so *X = 0, XR = 0* and *XB = 0;*

If < and, subjects will allocate all tokens to the Lottery BP, and then a half of endowments to Blue and the rest tokens to Purple, so *X = 0, XR = 0* and *XB = F/2;*

If = , and , subjects will allocate a half of endowments to the Lottery RO and the rest to the lottery BP. Then, subjects will allocate all tokens within the Lottery RO to Orange and all tokens within the Lottery BP to Purple, so *X = F/2, XR = 0* and *XB = 0;*

If = , and , subjects will allocate a half of endowments to the Lottery RO and the rest to the lottery BP. Then, subjects will allocate all tokens within the Lottery RO to Red and all tokens within the Lottery BP to Purple, so *X = F/2, XR = F/2* and *XB = 0;*

If = , and , subjects will allocate a half of endowments to the Lottery RO and the rest to the lottery BP. Then, subjects will allocate all tokens within the Lottery RO to Orange and all tokens within the Lottery BP to Blue, so *X = F/2, XR = 0* and *XB = F/2;*

If = , and , subjects will allocate a half of endowments to the Lottery RO and the rest to the lottery BP. Then, subjects will allocate a half of tokens within the Lottery RO to Red, the rest tokens within the same lottery to Orange and all tokens within the Lottery BP to Purple, so *X = F/2, XR = F/4* and *XB = 0;*

If = , and , subjects will allocate a half of endowments to the Lottery RO and the rest to the lottery BP. Then, subjects will allocate a half of tokens within the Lottery RO to Red, the rest tokens within the same lottery to Orange and all tokens within the Lottery BP to Blue, so *X = F/2, XR = F/4* and *XB = F/2;*

If = , and , subjects will allocate a half of endowments to the Lottery RO and the rest to the lottery BP. Then, subjects will allocate all tokens within the Lottery RO to Red, a half of tokens within the Lottery BP to Blue and the rest tokens to Purple, so *X = F/2, XR = F/2* and *XB = F/4;*

If = , and , subjects will allocate a half of endowments to the Lottery RO and the rest to the lottery BP. Then, subjects will allocate all tokens within the Lottery RO to Orange, a half of tokens within the Lottery BP to Blue and the rest tokens to Purple, so *X = F/2, XR = 0* and *XB = F/4;*

Otherwise, *X = F/2, XR = F/4* and *XB = F/4.*

Case 2. When *ER1 > ER2* and *EB1 < EB2*

If > and , subjects will allocate all tokens to Red, so *X = F, XR = F* and *XB = 0;*

If > and , subjects will allocate all tokens to Orange, so *X = F, XR = 0* and *XB = 0;*

If > and , subjects will allocate all tokens to the Lottery RO, and then a half of endowments to Red and the rest tokens to Orange, so *X = F, XR = F/2* and *XB = 0;*

If < and , subjects will allocate all tokens to Blue, so *X = 0, XR = 0* and *XB = F;*

If < and, subjects will allocate all tokens to Purple, so *X = 0, XR = 0* and *XB = 0;*

If < and, subjects will allocate all tokens to the Lottery BP, and then a half of endowments to Blue and the rest tokens to Purple, so *X = 0, XR = 0* and *XB = F/2;*

If =, and, subjects will allocate a half of endowments to the Lottery RO and the rest to the lottery BP. Then, subjects will allocate all tokens within the Lottery RO to Orange and all tokens within the Lottery BP to Purple, so *X = F/2, XR = 0* and *XB = 0;*

If =, and, subjects will allocate a half of endowments to the Lottery RO and the rest to the lottery BP. Then, subjects will allocate all tokens within the Lottery RO to Red and all tokens within the Lottery BP to Purple, so *X = F/2, XR = F/2* and *XB = 0;*

If =, and, subjects will allocate a half of endowments to the Lottery RO and the rest to the lottery BP. Then, subjects will allocate all tokens within the Lottery RO to Orange and all tokens within the Lottery BP to Blue, so *X = F/2, XR = 0* and *XB = F/2;*

If =, and, subjects will allocate a half of endowments to the Lottery RO and the rest to the lottery BP. Then, subjects will allocate a half of tokens within the Lottery RO to Red, the rest tokens within the same lottery to Orange and all tokens within the Lottery BP to Purple, so *X = F/2, XR = F/4* and *XB = 0;*

If =, and, subjects will allocate a half of endowments to the Lottery RO and the rest to the lottery BP. Then, subjects will allocate a half of tokens within the Lottery RO to Red, the rest tokens within the same lottery to Orange and all tokens within the Lottery BP to Blue, so *X = F/2, XR = F/4* and *XB = F/2;*

If =, and, subjects will allocate a half of endowments to the Lottery RO and the rest to the lottery BP. Then, subjects will allocate all tokens within the Lottery RO to Red, a half of tokens within the Lottery BP to Blue and the rest tokens to Purple, so *X = F/2, XR = F/2* and *XB = F/4;*

If =, and, subjects will allocate a half of endowments to the Lottery RO and the rest to the lottery BP. Then, subjects will allocate all tokens within the Lottery RO to Orange, a half of tokens within the Lottery BP to Blue and the rest tokens to Purple, so *X = F/2, XR = 0* and *XB = F/4;*

Otherwise, *X = F/2, XR = F/4* and *XB = F/4.*

Case 3. When *ER1 < ER2* and *EB1 < EB2*

If > and , subjects will allocate all tokens to Red, so *X = F, XR = F* and *XB = 0;*

If > and, subjects will allocate all tokens to Orange, so *X = F, XR = 0* and *XB = 0;*

If > and, subjects will allocate all tokens to the Lottery RO, and then a half of endowments to Red and the rest tokens to Orange, so *X = F, XR = F/2* and *XB = 0;*

If < and , subjects will allocate all tokens to Blue, so *X = 0, XR = 0* and *XB = F;*

If < and, subjects will allocate all tokens to Purple, so *X = 0, XR = 0* and *XB = 0;*

If < and, subjects will allocate all tokens to the Lottery BP, and then a half of endowments to Blue and the rest tokens to Purple, so *X = 0, XR = 0* and *XB = F/2;*

If =, and, subjects will allocate a half of endowments to the Lottery RO and the rest to the lottery BP. Then, subjects will allocate all tokens within the Lottery RO to Orange and all tokens within the Lottery BP to Purple, so *X = F/2, XR = 0* and *XB = 0;*

If =, and, subjects will allocate a half of endowments to the Lottery RO and the rest to the lottery BP. Then, subjects will allocate all tokens within the Lottery RO to Red and all tokens within the Lottery BP to Purple, so *X = F/2, XR = F/2* and *XB = 0;*

If =, and, subjects will allocate a half of endowments to the Lottery RO and the rest to the lottery BP. Then, subjects will allocate all tokens within the Lottery RO to Orange and all tokens within the Lottery BP to Blue, so *X = F/2, XR = 0* and *XB = F/2;*

If =, and, subjects will allocate a half of endowments to the Lottery RO and the rest to the lottery BP. Then, subjects will allocate a half of tokens within the Lottery RO to Red, the rest tokens within the same lottery to Orange and all tokens within the Lottery BP to Purple, so *X = F/2, XR = F/4* and *XB = 0;*

If =, and, subjects will allocate a half of endowments to the Lottery RO and the rest to the lottery BP. Then, subjects will allocate a half of tokens within the Lottery RO to Red, the rest tokens within the same lottery to Orange and all tokens within the Lottery BP to Blue, so *X = F/2, XR = F/4* and *XB = F/2;*

If =, and, subjects will allocate a half of endowments to the Lottery RO and the rest to the lottery BP. Then, subjects will allocate all tokens within the Lottery RO to Red, a half of tokens within the Lottery BP to Blue and the rest tokens to Purple, so *X = F/2, XR = F/2* and *XB = F/4;*

If =, and, subjects will allocate a half of endowments to the Lottery RO and the rest to the lottery BP. Then, subjects will allocate all tokens within the Lottery RO to Orange, a half of tokens within the Lottery BP to Blue and the rest tokens to Purple, so *X = F/2, XR = 0* and *XB = F/4;*

Otherwise, *X = F/2, XR = F/4* and *XB = F/4.*

Case 4. When *ER1 < ER2* and *EB1 > EB2*

If > and , subjects will allocate all tokens to Red, so *X = F, XR = F* and *XB = 0;*

If > and, subjects will allocate all tokens to Orange, so *X = F, XR = 0* and *XB = 0;*

If > and, subjects will allocate all tokens to the Lottery RO, and then a half of endowments to Red and the rest tokens to Orange, so *X = F, XR = F/2* and *XB = 0;*

If < and , subjects will allocate all tokens to Blue, so *X = 0, XR = 0* and *XB = F;*

If < and, subjects will allocate all tokens to Purple, so *X = 0, XR = 0* and *XB = 0;*

If < and, subjects will allocate all tokens to the Lottery BP, and then a half of endowments to Blue and the rest tokens to Purple, so *X = 0, XR = 0* and *XB = F/2;*

If =, and, subjects will allocate a half of endowments to the Lottery RO and the rest to the lottery BP. Then, subjects will allocate all tokens within the Lottery RO to Orange and all tokens within the Lottery BP to Purple, so *X = F/2, XR = 0* and *XB = 0;*

If =, and, subjects will allocate a half of endowments to the Lottery RO and the rest to the lottery BP. Then, subjects will allocate all tokens within the Lottery RO to Red and all tokens within the Lottery BP to Purple, so *X = F/2, XR = F/2* and *XB = 0;*

If =, and, subjects will allocate a half of endowments to the Lottery RO and the rest to the lottery BP. Then, subjects will allocate all tokens within the Lottery RO to Orange and all tokens within the Lottery BP to Blue, so *X = F/2, XR = 0* and *XB = F/2;*

If =, and, subjects will allocate a half of endowments to the Lottery RO and the rest to the lottery BP. Then, subjects will allocate a half of tokens within the Lottery RO to Red, the rest tokens within the same lottery to Orange and all tokens within the Lottery BP to Purple, so *X = F/2, XR = F/4* and *XB = 0;*

If =, and, subjects will allocate a half of endowments to the Lottery RO and the rest to the lottery BP. Then, subjects will allocate a half of tokens within the Lottery RO to Red, the rest tokens within the same lottery to Orange and all tokens within the Lottery BP to Blue, so *X = F/2, XR = F/4* and *XB = F/2;*

If =, and, subjects will allocate a half of endowments to the Lottery RO and the rest to the lottery BP. Then, subjects will allocate all tokens within the Lottery RO to Red, a half of tokens within the Lottery BP to Blue and the rest tokens to Purple, so *X = F/2, XR = F/2* and *XB = F/4;*

If =, and, subjects will allocate a half of endowments to the Lottery RO and the rest to the lottery BP. Then, subjects will allocate all tokens within the Lottery RO to Orange, a half of tokens within the Lottery BP to Blue and the rest tokens to Purple, so *X = F/2, XR = 0* and *XB = F/4;*

Otherwise, *X = F/2, XR = F/4* and *XB = F/4.*

Risk-Lover case:

Using the backward method, and considering the second stage first:

Case 1.1. If

Case 1.2. If

If *XR=0*, it belongs to Case 1.2, so .

If *XR=X*, it belongs to Case 1.1, so.

If , *XR=X*. Otherwise, *XR=0.*

Case 2.1. If

Case 2.2. If

If *XB=0*, it belongs to Case 2.2, so .

If *XB=F-X*, it belongs to Case 2.1, so .

If , *XB=F-X*. Otherwise, *XB=0*.

Given stage-2 optimal payoff, stage-1 problem becomes:
